# Supplementary material
Source: PubMed Central journal article supplement (PMC3425235)
Supplement: ismej201233x3.pdf [file ismej201233x3.pdf]

**Table S1:** Environmental data for the annual survey carried out in Lake Redon from May 2007 to Apr 2008.

| Depth (m) | May-07                                                       | Jun-07 | Jul-07 | Aug-07 | Sep-07 | Oct-07 | Nov-07 | Dec-07 | Mar-08 | Apr-08 |
|-----------|--------------------------------------------------------------|--------|--------|--------|--------|--------|--------|--------|--------|--------|
|           |                                                              |        |        |        |        |        |        |        |        |        |
|           | <b>DOC (<math>\mu\text{M}</math>)</b>                        |        |        |        |        |        |        |        |        |        |
| SML/Slush | 100.0                                                        | 66.6   | 66.6   | 83.3   | 75.0   | 100.0  | 66.6   | 66.6   | 50.0   | 91.7   |
| 2         | 83.3                                                         | 58.3   | 66.6   | 75.0   | 66.6   | 83.3   | /      | 58.3   | 41.7   | 83.3   |
| 10        | 58.3                                                         | 66.6   | 58.3   | 58.3   | 83.3   | 83.3   | /      | 50.0   | 33.3   | 41.7   |
| 20        | 50.0                                                         | 58.3   | 50.0   | 58.3   | 58.3   | 75.0   | /      | 50.0   | 25.0   | 50.0   |
| 35        | 58.3                                                         | 50.0   | 50.0   | 50.0   | 50.0   | 50.0   | /      | 50.0   | 25.0   | 33.3   |
| 60        | 50.0                                                         | 50.0   | 58.3   | 50.0   | 41.7   | 41.7   | /      | 50.0   | 25.0   | 8.3    |
|           |                                                              |        |        |        |        |        |        |        |        |        |
|           | <b><math>\text{NH}_4^+</math> (<math>\mu\text{M}</math>)</b> |        |        |        |        |        |        |        |        |        |
| SML/Slush | 2.4                                                          | 1.4    | 0.3    | 0.4    | 0.4    | 0.4    | 0.9    | 0.6    | 0.8    | 2.8    |
| 2         | 2.0                                                          | 0.2    | 0.2    | 0.3    | 0.3    | 0.3    | 0.8    | 0.5    | 0.7    | 2.6    |
| 10        | 0.9                                                          | 0.3    | 0.2    | 0.2    | 0.4    | 0.2    | 0.9    | 0.5    | 0.7    | 1.8    |
| 20        | 0.9                                                          | 0.2    | 0.1    | 0.1    | 0.6    | 0.2    | 0.8    | 0.6    | 0.7    | 1.5    |
| 35        | 1.1                                                          | 0.7    | 0.3    | 0.1    | 0.8    | 1.1    | 1.1    | 0.6    | 0.5    | 1.4    |
| 60        | 1.0                                                          | 1.6    | 1.7    | 2.6    | 3.4    | 4.6    | 0.7    | 0.7    | 1.4    | 3.4    |
|           |                                                              |        |        |        |        |        |        |        |        |        |
|           | <b><math>\text{NO}_3^-</math> (<math>\mu\text{M}</math>)</b> |        |        |        |        |        |        |        |        |        |
| SML/Slush | 10                                                           | 9      | 9      | 7      | 6      | 6      | 7      | 8      | 8      | 8      |
| 2         | 10                                                           | 9      | 9      | 7      | 6      | 6      | 7      | 8      | 8      | 8      |
| 10        | 9                                                            | 8      | 8      | 8      | 7      | 6      | 7      | 8      | 8      | 7      |
| 20        | 9                                                            | 9      | 8      | 8      | 7      | 6      | 7      | 7      | 8      | 8      |
| 35        | 9                                                            | 8      | 11     | 9      | 7      | 7      | 8      | 8      | 8      | 7      |
| 60        | 9                                                            | 8      | 10     | 10     | 8      | 9      | 8      | 7      | 8      | 8      |
|           |                                                              |        |        |        |        |        |        |        |        |        |
|           | <b><math>\text{NO}_2^-</math> (<math>\mu\text{M}</math>)</b> |        |        |        |        |        |        |        |        |        |
| SML/Slush | 0.04                                                         | 0.05   | 0.05   | 0.08   | 0.05   | 0.08   | 0.07   | 0.07   | 0.09   | 0.08   |
| 2         | 0.04                                                         | 0.13   | 0.05   | 0.08   | 0.05   | 0.08   | 0.07   | 0.07   | 0.07   | 0.05   |
| 10        | 0.04                                                         | 0.13   | 0.07   | 0.09   | 0.04   | 0.08   | 0.05   | 0.05   | 0.08   | 0.03   |
| 20        | 0.03                                                         | 0.13   | 0.10   | 0.09   | 0.06   | 0.07   | 0.06   | 0.06   | 0.06   | 0.02   |
| 35        | 0.03                                                         | 0.09   | 0.07   | 0.06   | 0.02   | 0.08   | 0.05   | 0.05   | 0.08   | 0.02   |
| 60        | 0.03                                                         | 0.04   | 0.09   | 0.08   | 0.07   | 0.07   | 0.05   | 0.05   | 0.03   | 0.02   |
|           |                                                              |        |        |        |        |        |        |        |        |        |
|           | <b>Chla (<math>\mu\text{g L}^{-1}</math>)</b>                |        |        |        |        |        |        |        |        |        |
| SML/Slush | 0.16                                                         | 0.35   | 1.03   | 1.10   | 1.24   | 1.05   | 1.15   | 0.70   | 0.45   | 0.16   |
| 2         | 0.21                                                         | 0.97   | 1.12   | 1.20   | 1.31   | 1.13   | 1.37   | 0.93   | 0.50   | 0.22   |
| 10        | 0.55                                                         | 2.10   | 1.88   | 1.39   | 1.92   | 1.03   | 1.57   | 1.93   | 0.70   | 0.54   |
| 20        | 0.34                                                         | 2.02   | 2.08   | 1.23   | 1.36   | 1.22   | 1.43   | 1.62   | 0.50   | 0.17   |
| 35        | 0.54                                                         | 1.98   | 3.29   | 4.44   | 2.26   | 1.67   | 1.42   | 1.28   | 0.23   | 0.12   |

|                  |                                                                   |               |               |               |               |               |               |               |               |               |
|------------------|-------------------------------------------------------------------|---------------|---------------|---------------|---------------|---------------|---------------|---------------|---------------|---------------|
| 60               | 0.21                                                              | 0.57          | 0.91          | 0.70          | 0.53          | 0.40          | 1.19          | 0.98          | 0.16          | 0.07          |
|                  |                                                                   |               |               |               |               |               |               |               |               |               |
| <b>Depth (m)</b> | <b>May-07</b>                                                     | <b>Jun-07</b> | <b>Jul-07</b> | <b>Aug-07</b> | <b>Sep-07</b> | <b>Oct-07</b> | <b>Nov-07</b> | <b>Dec-07</b> | <b>Mar-08</b> | <b>Apr-08</b> |
|                  | <b>Temperature (°C)</b>                                           |               |               |               |               |               |               |               |               |               |
| SML/Slush        | 4                                                                 | 4             | 13            | 13            | 12            | 10            | 4             | 1             | 0             | 0             |
| 2                | 4                                                                 | 9             | 13            | 13            | 12            | 10            | 4             | 2             | 1.6           | 1.9           |
| 10               | 3.9                                                               | 8.3           | 11.4          | 12.7          | 12.4          | 9.6           | 4.1           | 1.9           | 2.2           | 2.5           |
| 20               | 3.9                                                               | 6.7           | 7.4           | 8.2           | 9             | 9.5           | 4.1           | 2.5           | 2.6           | 2.9           |
| 35               | 4                                                                 | 4             | 4             | 4             | 4             | 5             | 4             | 3             | 3             | 3.3           |
| 60               | 4                                                                 | 4             | 4             | 4             | 4             | 4             | 4.1           | 3.2           | 3.4           | 3.7           |
|                  |                                                                   |               |               |               |               |               |               |               |               |               |
|                  | <b>Oxygen (µM)</b>                                                |               |               |               |               |               |               |               |               |               |
| SML/Slush        | /                                                                 | /             | /             | /             | /             | /             | /             | /             | /             | /             |
| 2                | 306                                                               | 300           | 272           | 272           | 272           | 288           | 316           | 353           | 403           | 322           |
| 10               | 300                                                               | 300           | 284           | 262           | 272           | 294           | 300           | 362           | 316           | 303           |
| 20               | 319                                                               | 316           | 328           | 319           | 310           | 294           | 300           | 378           | 350           | 269           |
| 35               | 300                                                               | 303           | 297           | 303           | 300           | 297           | 303           | 336           | 297           | 291           |
| 60               | 219                                                               | 275           | 256           | 222           | 222           | 206           | 300           | 325           | 228           | 172           |
|                  |                                                                   |               |               |               |               |               |               |               |               |               |
|                  | <b>Bacterial abundance (×10<sup>5</sup> cell mL<sup>-1</sup>)</b> |               |               |               |               |               |               |               |               |               |
| SML/Slush        | 7.2                                                               | 5.9           | 13.4          | 6.4           | 5.2           | 6.0           | 4.6           | 4.8           | 6.4           | 5.1           |
| 2                | 5.7                                                               | 3.4           | 15.2          | 6.4           | 5.3           | 5.8           | 6.2           | 4.1           | 2.3           | 3.3           |
| 10               |                                                                   | 4.9           | 11.6          | 7.3           | 6.3           | 5.1           | 5.7           | 4.9           | 2.6           | 3.7           |
| 20               |                                                                   | 3.2           | 20.4          | 11.3          | 12.1          | 5.4           | 5.4           | 4.5           | 2.2           | 3.6           |
| 35               |                                                                   | 5.6           | 21.5          | 19.2          | 11.4          | 5.1           | 6.4           | 3.7           | 2.1           | 3.3           |
| 60               |                                                                   | 9.3           | 14.5          | 16.4          | 8.8           | 7.6           | 7.0           | 5.2           | 2.8           | 4.0           |
|                  |                                                                   |               |               |               |               |               |               |               |               |               |
|                  | <b>Archaeal abundance (×10<sup>3</sup> cell mL<sup>-1</sup>)</b>  |               |               |               |               |               |               |               |               |               |
| SML/Slush        | 2.22                                                              | 10.5          | 45.2          | 3.2           | 26.9          | 8.7           | 21.0          | 11.0          | 197.4         | 91.2          |
| 2                | 21.3                                                              | 9.5           | 44.9          | 22.4          | 10.5          | 3.9           | 17.5          | 15.0          | 10.9          | 34.4          |
| 10               |                                                                   | 15.0          | 34.9          | 15.7          | 24.7          | 2.0           | 15.9          | 13.9          | 12.8          | 10.9          |
| 20               |                                                                   | 25.0          | 215.7         | 40.4          | 134.6         | 3.2           | 11.6          | 10.6          | 4.0           | 10.9          |
| 35               |                                                                   | 28.4          | 195.9         | 71.8          | 116.7         | 2.0           | 18.3          | 20.3          | 20.5          | 2.5           |
| 60               |                                                                   | 62.8          | 194.9         | 53.9          | 74.5          | 19.0          | 15.3          | 17.3          | 22.5          | 10.2          |
