# Supplementary material
Source: PubMed Central journal article supplement (PMC3425235)
Supplement: ismej201233x4.pdf [file ismej201233x4.pdf]

**Table S2:** Accession number of the archaeal amoA gene sequences found in this study and contained in the OTUs of Fig. 5 and S1.

| <b>AmoA OTU</b> | <b>Member's accession number</b>                                                                                                                                                                                                                                                                                                                                                                                                                                                                                                                                                                             | <b>Number of sequences</b> |
|-----------------|--------------------------------------------------------------------------------------------------------------------------------------------------------------------------------------------------------------------------------------------------------------------------------------------------------------------------------------------------------------------------------------------------------------------------------------------------------------------------------------------------------------------------------------------------------------------------------------------------------------|----------------------------|
| PyrSF1-OTU1     | HE598669                                                                                                                                                                                                                                                                                                                                                                                                                                                                                                                                                                                                     | 1                          |
| PyrSF1-OTU2     | HE598680, HE598570, HE598566, HE598579, HE598691, HE598660, HE598648, HE598694, HE598677, HE598592, HE598685, HE598679, HE598580, HE598696, HE598688, HE598641, HE598689, HE598667, HE598587, HE598676, HE598591, HE598606, HE598604, HE598567, HE598686, HE598589, HE598588, HE598627, HE598575, HE598661, HE598603, HE598602, HE598663, HE598571, HE598569, HE598645, HE598601, HE598695, HE598607, HE598600, HE598647, HE598609, HE598593, HE598656, HE598692, HE598659, HE598693, HE598650, HE598658, HE598657, HE598649, HE598666, HE598599, HE598682, HE598585, HE598664, HE598672, HE598608, HE598670 | 59                         |
| PyrSF1-OTU3     | HE598597                                                                                                                                                                                                                                                                                                                                                                                                                                                                                                                                                                                                     | 1                          |
| PyrSF1-OTU4     | HE598687, HE598642, HE598633, HE598654, HE598596, HE598640, HE598576, HE598653, HE598665, HE598652, HE598651, HE598675, HE598683, HE598594                                                                                                                                                                                                                                                                                                                                                                                                                                                                   | 2                          |
| PyrSF1-OTU5     | HE598605, HE598598                                                                                                                                                                                                                                                                                                                                                                                                                                                                                                                                                                                           | 2                          |
| PyrSF1-OTU6     | HE598655, HE598646                                                                                                                                                                                                                                                                                                                                                                                                                                                                                                                                                                                           | 2                          |
| PyrSF1-OTU7     | HE598630                                                                                                                                                                                                                                                                                                                                                                                                                                                                                                                                                                                                     | 1                          |
| PyrSF1-OTU8     | HE598635, HE598573, HE598634, HE598636, HE598674, HE598574, HE598678, HE598662, HE598643, HE598590, HE598625, HE598671                                                                                                                                                                                                                                                                                                                                                                                                                                                                                       | 12                         |
| PyrSF1-OTU9     | HE598681, HE598578, HE598582, HE598581, HE598572, HE598637, HE598631, HE598568, HE598644, HE598583, HE598684, HE598620, HE598610, HE598595, HE598586, HE598584                                                                                                                                                                                                                                                                                                                                                                                                                                               | 16                         |
| PyrSF1-OTU10    | HE598612                                                                                                                                                                                                                                                                                                                                                                                                                                                                                                                                                                                                     | 1                          |
| OTU11           | HE598616, HE598613                                                                                                                                                                                                                                                                                                                                                                                                                                                                                                                                                                                           | 2                          |
| PyrFLS-OTU12    | HE598614, HE598623, HE598619, HE598617, HE598629, HE598618, HE598624, HE598632, HE598615, HE598621, HE598628, HE598622, HE598639, HE598611                                                                                                                                                                                                                                                                                                                                                                                                                                                                   | 14                         |
| PyrF5-OTU13     | HE598626                                                                                                                                                                                                                                                                                                                                                                                                                                                                                                                                                                                                     | 1                          |
| PyrSF1-OTU14    | HE598668                                                                                                                                                                                                                                                                                                                                                                                                                                                                                                                                                                                                     | 1                          |
| PyrSF1-OTU15    | HE598638                                                                                                                                                                                                                                                                                                                                                                                                                                                                                                                                                                                                     | 1                          |
| OTU16           | HE598673                                                                                                                                                                                                                                                                                                                                                                                                                                                                                                                                                                                                     | 1                          |
| OTU17           | HE598577, HE598690                                                                                                                                                                                                                                                                                                                                                                                                                                                                                                                                                                                           | 2                          |
